# Supplementary material for: New acentric quinolinium crystal with high order parameter for nonlinear optical and electro-optic applications
Source: Royal Society of Chemistry journal article supplement (doi:10.1039/c2ce06667j), 2012-01-01
Supplement: c2ce06667j.pdf [file c2ce06667j.pdf]

## Supporting Information

for

# **New Acentric Quinolinium Crystal with High Order Parameter for Nonlinear Optical and Electro-Optic Applications**

**Pil-Joo Kim,<sup>a</sup> Mojca Jazbinsek,<sup>b</sup> Jae-Hyeok Jeong,<sup>a</sup> Jong-Taek Kim,<sup>c</sup> Yoon Sup  
Lee,<sup>c</sup> Yeong-Min Jung,<sup>d</sup> Soon W. Lee,<sup>d</sup> O-Pil Kwon<sup>\*,a</sup>**

<sup>a</sup> *Department of Molecular Science and Technology, Ajou University, Suwon 443-749  
(Korea).*

*E-mail: opilkwon@ajou.ac.kr; Fax: +82 31 219 1610; Tel: +82 31 219 2462*

<sup>b</sup> *Rainbow Photonics AG, CH-8048 Zurich (Switzerland).*

<sup>c</sup> *Department of Chemistry, Korea Advanced Institute of Science and Technology  
(KAIST), Daejeon 305-701 (Korea).*

<sup>d</sup> *Department of Chemistry (BK21), Sungkyunkwan University, Natural Science  
Campus, Suwon 440-746 (Korea).*

## 1. Crystallographic Data

**Table S1.** X-ray data collection and structure refinement for HMQ-NS.

|                                       |                                                   |                                            |            |
|---------------------------------------|---------------------------------------------------|--------------------------------------------|------------|
| Empirical formula                     | C <sub>29</sub> H <sub>25</sub> NO <sub>5</sub> S | $\mu$ , mm <sup>-1</sup>                   | 0.183      |
| Formula weight                        | 499.56                                            | $F(000)$                                   | 524        |
| Temperature, K                        | 296(2)                                            | $T_{\max}$                                 | 0.9712     |
| Crystal system                        | monoclinic                                        | $T_{\min}$                                 | 0.9573     |
| Space group                           | <i>Pn</i>                                         | $\theta$ range (°)                         | 2.32–28.43 |
| <i>a</i> , Å                          | 7.1438(2)                                         | No. of reflns collected                    | 17297      |
| <i>b</i> , Å                          | 10.8234(2)                                        | No. of reflns independent                  | 5202       |
| <i>c</i> , Å                          | 15.2054(3)                                        | No. of reflns with $I > 2\sigma(I)$        | 4274       |
| $\alpha$ , (°)                        | 90                                                | No. of parameters                          | 402        |
| $\beta$ , (°)                         | 99.5620(10)                                       | Flack parameter                            | 0.04(6)    |
| $\gamma$ , (°)                        | 90                                                | Max., in $\Delta\rho$ (e Å <sup>-3</sup> ) | 0.221      |
| <i>V</i> , Å <sup>3</sup>             | 1159.35(5)                                        | Min., in $\Delta\rho$ (e Å <sup>-3</sup> ) | -0.194     |
| <i>Z</i>                              | 2                                                 | <i>GOF</i> on $F^2$                        | 1.042      |
| $d_{\text{cal}}$ , g cm <sup>-3</sup> | 1.431                                             | $R^a$                                      | 0.0394     |
|                                       |                                                   | $wR2^b$                                    | 0.0851     |

$$^a R = \Sigma[|F_o| - |F_c|] / \Sigma|F_o|, \quad ^b wR2 = \Sigma[w(F_o^2 - F_c^2)^2] / \Sigma[w(F_o^2)^2]^{1/2}$$

**Table S2.** Selected bond lengths (Å) and bond angles (°) in HMQ-NS crystal.

|            |          |          |          |          |          |
|------------|----------|----------|----------|----------|----------|
| S1–O4      | 1.442(2) | S1–O5    | 1.444(2) | S1–O3    | 1.455(2) |
| O1–C14     | 1.365(3) | O1–C18   | 1.412(3) | O2–C15   | 1.345(3) |
| N1–C19     | 1.484(3) |          |          |          |          |
| O4–S1–O5   | 114.3(1) | O4–S1–O3 | 113.3(1) | O5–S1–O3 | 112.7(1) |
| C14–O1–C18 | 118.6(2) | N1–C1–S1 | 179.6(2) | C2–C3–C4 | 178.6(3) |

**Table S3.** Hydrogen bonds for HMQ-NS crystal (Å and °).

| D–H...A     | D–H     | H...A   | D...A    | D–H–A  |
|-------------|---------|---------|----------|--------|
| O2–H2O...O1 | 0.82(4) | 2.28(4) | 2.667(2) | 109(3) |
| O2–H2O...O3 | 0.82(4) | 1.90(4) | 2.664(2) | 155(4) |

## 2. Quantum Chemical Calculations

**Table S4.** Calculated results of the finite-field (FF) method with the experimental (EXP) cation structures of HMQ-NS and HMQ-T crystals at the B3LYP/6-311+G(d) level: the zero-frequency hyperpolarizability tensor  $\beta_{ijk}$  ( $\times 10^{-30}$  esu) and the first-order hyperpolarizability  $\beta_{\max}$  ( $\times 10^{-30}$  esu).

|                | HMQ-NS cation<br>(EXP) | HMQ-T cation<br>(EXP) <sup>14</sup> |
|----------------|------------------------|-------------------------------------|
| $\beta_{xxx}$  | 0.42                   | 0.23                                |
| $\beta_{xyx}$  | -0.38                  | -0.27                               |
| $\beta_{xyy}$  | 0.12                   | 0.15                                |
| $\beta_{yyy}$  | -0.37                  | -0.32                               |
| $\beta_{xxz}$  | 2.34                   | 1.32                                |
| $\beta_{xyz}$  | -1.53                  | -1.02                               |
| $\beta_{yyz}$  | 0.05                   | 0.88                                |
| $\beta_{xzz}$  | 15.15                  | 8.44                                |
| $\beta_{yzz}$  | -14.89                 | -19.43                              |
| $\beta_{zzz}$  | 155.92                 | 164.95                              |
| $\beta_{\max}$ | 160.3                  | 169                                 |

**Table S5.** The components of  $\beta_{ijk}^{\text{eff}}$  tensor (in  $10^{-30}$  esu) in the Cartesian XYZ system.

| HMQ-NS | $\beta_{333}^{\text{eff}}$ | $\beta_{223}^{\text{eff}}$ | $\beta_{113}^{\text{eff}}$ | $\beta_{111}^{\text{eff}}$ | $\beta_{221}^{\text{eff}}$ | $\beta_{331}^{\text{eff}}$ |
|--------|----------------------------|----------------------------|----------------------------|----------------------------|----------------------------|----------------------------|
|        | <b>-149.4</b>              | -5.8                       | -0.8                       | 0.0                        | -0.1                       | 0                          |

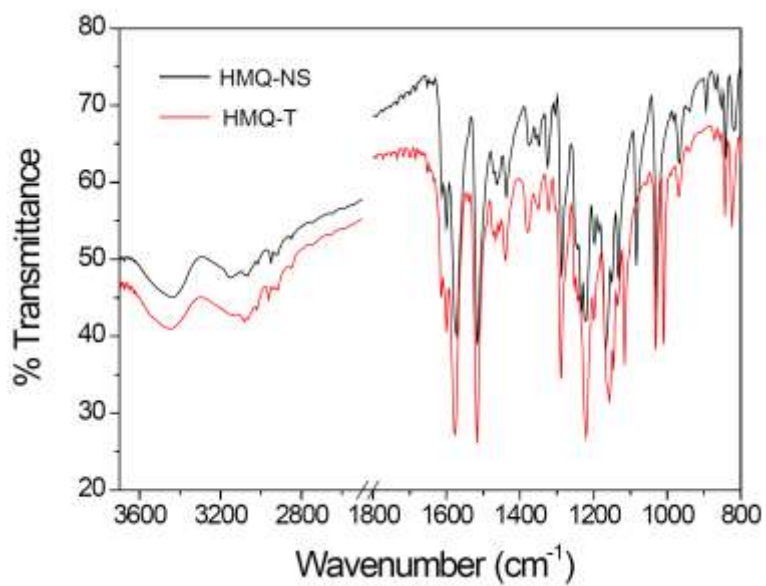

**Figure S1.** Infrared (IR) absorption spectra of HMQ-NS and HMQ-T<sup>14</sup> crystals.

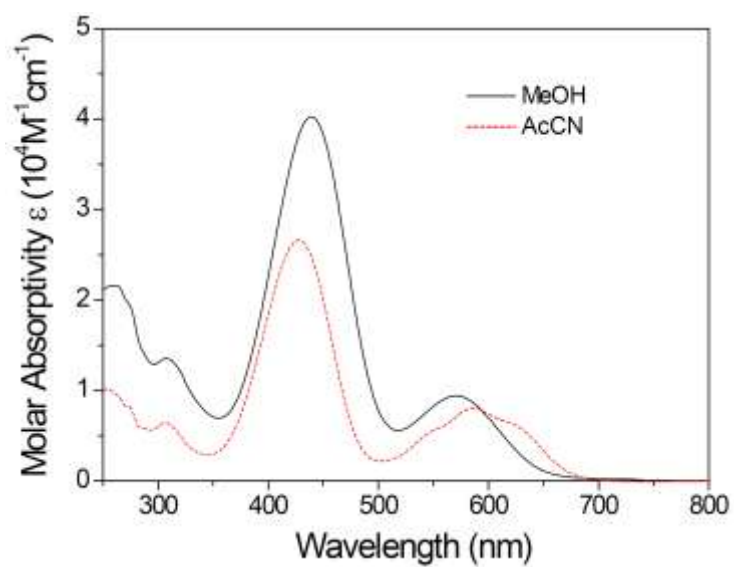

**Figure S2.** UV-vis. absorption spectra of HMQ-NS compound in methanol and acetonitrile solutions.
